# Supplementary material for: False Identity Detection Using Complex Sentences
Source: PubMed Central journal article supplement (PMC5845552; doi:10.3389/fpsyg.2018.00283), 2018-03-06
Supplement: Presentation1.pdf [file Presentation1.pdf]

## **APPENDIX 1**

### **Sentences used in the experiment (N=60)**

#### CONTROL TRUE (CONTROL YES, N=10)

I am in front of a computer.

I am standing in front of a computer.

I'm using a computer.

I am responding with a keyboard.

Now, I'm sitting on a chair.

Right now, I'm sitting.

I'm doing an identity verification test.

I am participating in a test.

I'm reading sentences.

I am responding to phrases.

#### CONTROL FALSE (CONTROL NO, N=10)

I'm swimming in the sea.

I'm climbing a mountain.

I'm traveling by airplane.

I am aboard an airplane.

Now, I am on the beach.

I'm taking in the sun at the beach.

I'm eating at the restaurant.

I'm having lunch at the restaurant.

I'm playing football.

I'm watching a football match.

10 SIMPLE TRUE (SIMPLE YES, N=10)

Liars who respond with a faked identity have to respond with TRUE based on the profile they overlearned in a preliminary phase of the experiment.

My name is Merylin.

I was born in Trieste.

I live in Monfalcone.

I am single.

My last name is Monaro.

I am a student.

I was born in the province of Trieste (for the United States [US], this could be: I was born in California State).

I live in Via Timavo 47.

I was born on 20<sup>th</sup> April.

I was born in 1987.

10 SIMPLE FALSE (SIMPLE NO, N=10)

My last name is Zurri.

My name is Greta.

I was born on 08.15.1990.

My birthday is in August.

I'm married.

My city of birth is Ortona.

I live in Lanciano.

I am an engineer.

I was born in the province of Chieti (for the US, this could be: I was born in Florida State).

I live in via Postojna.

10 COMPLEX TRUE (FIVE WITH TWO INFO, AND FIVE WITH THREE INFO) (COMPLEX

YES, N=10)

I am Merylin, born in Trieste.

My name is Merylin Monaro.

I was born in Trieste, and I live in Monfalcone.

I was born in April 1987 in Trieste.

I am a student, and I live in Via Timavo 47.

In the 1987, I was born in April in Trieste.

I am Monaro, a single student.

My name is Merylin, I am single and I live in Monfalcone.

I am the student Merylin, born on 20.04.1987.

I am the student Merylin, born in April.

10 COMPLEX FALSE (FIVE WITH TWO INFO (THE FALSE INFO IS ALWAYS IN THE SECOND PLACE), FIVE WITH THREE INFO (THREE WITH ONLY ONE FALSE INFO IN THE LAST PLACE AND TWO WITH TWO FALSE INFO IN THE SECOND AND THIRD PLACES) (COMPLEX NO, N=10)

I am Merylin, and I live in Lanciano.

I was born on 20<sup>th</sup> April 1987 in Ortona.

I was born in Trieste, and I live in Lanciano.

I am a student, and I am married.

I live in Monfalcone in via Postojna 65.

I am Merylin, a single engineer.

I am Merylin, a student born in August.

Merylin Monaro was born in August 1990.

I am Merylin Zurri, and I am married.

I am Monaro, a married woman of Ortona.

## APPENDIX 2

---

### Raw predictors

---

|                                |                                                                                                                                        |
|--------------------------------|----------------------------------------------------------------------------------------------------------------------------------------|
| <b>Total RT</b>                | Mean Reaction Time on all test questions                                                                                               |
| <b>Total Yes RT</b>            | Mean Reaction Time on all test questions that required a YES response                                                                  |
| <b>Total No RT</b>             | Mean Reaction Time on all test questions that required a NO response                                                                   |
| <b>Control Tot RT</b>          | Mean Reaction Time on all control questions                                                                                            |
| <b>Control Yes RT</b>          | Mean Reaction Time on control questions that required a YES response                                                                   |
| <b>Control No RT</b>           | Mean Reaction Time on control questions that required a NO response                                                                    |
| <b>Simple Tot RT</b>           | Mean Reaction Time on all simple questions                                                                                             |
| <b>Simple Yes RT</b>           | Mean Reaction Time on simple questions that required a YES response                                                                    |
| <b>Simple No RT</b>            | Mean Reaction Time on simple questions that required a NO response                                                                     |
| <b>Complex Tot RT</b>          | Mean Reaction Time on all complex questions                                                                                            |
| <b>Complex Yes RT</b>          | Mean Reaction Time on complex questions that required a YES response                                                                   |
| <b>Complex No RT</b>           | Mean Reaction Time on complex questions that required a NO response                                                                    |
| <b>Mean Total errors</b>       | Mean number of errors on all test questions (number of errors on all test questions divided by total number of stimuli on entire test) |
| <b>Mean Control Tot errors</b> | Mean number of errors on all control questions (number of errors on all control questions divided by total number of control stimuli)  |
| <b>Mean Simple Tot errors</b>  | Mean number of errors on all simple questions (number of errors on all simple questions divided by total number of simple stimuli)     |
| <b>Mean Complex Tot errors</b> | Mean number of errors on all complex questions (number of errors on all complex questions divided by total number of complex stimuli)  |
| <b>Raw Total errors</b>        | Total number of errors on all test questions                                                                                           |
| <b>Raw Control Tot errors</b>  | Number of errors on all control questions                                                                                              |
| <b>Raw Simple Tot errors</b>   | Number of errors on all simple questions                                                                                               |

|                               |                                                                            |
|-------------------------------|----------------------------------------------------------------------------|
| <b>Raw Complex Tot errors</b> | Number of errors on all complex questions                                  |
| <b>IES Control</b>            | Inverse Efficiency Score calculated for RT and errors of control questions |
| <b>IES Simple</b>             | Inverse Efficiency Score calculated for RT and errors of simple questions  |
| <b>IES Complex</b>            | Inverse Efficiency Score calculated for RT and errors of complex questions |

---

**Normalized predictors**

---

|                                |                                                                                                  |
|--------------------------------|--------------------------------------------------------------------------------------------------|
| <b>Total Yes RT/Total RT</b>   | Ratio between RT on all test questions that required a YES response and RT on all test questions |
| <b>Total No RT/Total RT</b>    | Ratio between RT on all test questions that required a NO response and RT on all test questions  |
| <b>Control Tot RT/Total RT</b> | Ratio between RT on all control questions and RT on all test questions                           |
| <b>Control Yes RT/Total RT</b> | Ratio between RT on control questions that required a YES response and RT on all test questions  |
| <b>Control No RT/Total RT</b>  | Ratio between RT on control questions that required a NO response and RT on all test questions   |
| <b>Simple Tot RT/Total RT</b>  | Ratio between RT on all simple questions and RT on all test questions                            |
| <b>Simple Yes RT/Total RT</b>  | Ratio between RT on simple questions that required a YES response and RT on all test questions   |
| <b>Simple No RT/Total RT</b>   | Ratio between RT on simple questions that required a NO response and RT on all test questions    |
| <b>Complex Tot RT/Total RT</b> | Ratio between RT on all complex questions and RT on all test questions                           |
| <b>Complex Yes RT/Total RT</b> | Ratio between RT on complex questions that required a YES response and RT on all test questions  |

|                                                      |                                                                                                                                                                                          |
|------------------------------------------------------|------------------------------------------------------------------------------------------------------------------------------------------------------------------------------------------|
| <b>Complex No RT/Total RT</b>                        | Ratio between RT on complex questions that required a NO response and RT on all test questions                                                                                           |
| <b>(Total Yes RT - Total No RT)/Total RT</b>         | Ratio of the difference between the RT on all test questions that required a YES response and the RT on all test questions that required a NO response with the RT on all test questions |
| <b>(Control Yes RT - Control No RT)/Total RT</b>     | Ratio of the difference between the RT on control questions that required a YES response and the RT on control questions that required a NO response with the RT on all test questions   |
| <b>(Simple Yes RT - Simple No RT)/Total RT</b>       | Ratio of the difference between the RT on simple questions that required a YES response and the RT on simple questions that required a NO response with the RT on all test questions     |
| <b>(Complex Yes RT - Complex No RT)/Total RT</b>     | Ratio of the difference between the RT on complex questions that required a YES response and the RT on complex questions that required a NO response with the RT on all test questions   |
| <b>Raw Simple Tot errors/Raw Control Tot errors</b>  | Ratio between the number of errors on all simple questions and the number of errors on all control questions                                                                             |
| <b>Raw Complex Tot errors/Raw Control Tot errors</b> | Ratio between the number of errors on all complex questions and the number of errors on all control questions                                                                            |
| <b>Raw Complex Tot errors/Raw Simple Tot errors</b>  | Ratio between the number of errors on all complex questions and the number of errors on all simple questions                                                                             |

---
